# Supplementary material for: Aerobic exercise reverses aging-induced depth-dependent decline in cerebral microcirculation
Source: PubMed Central journal article supplement (PMC9949059; doi:10.1101/2023.02.12.528244), 2023-02-13

590 **[Source Files]**

591 **Figure3\_SourceData1**

592 Capillary RBC flux measured in young sedentary mice

593 **Figure3\_Source Data2**

594 Capillary RBC flux measured in aged mice

595 **Figure3\_Source Data3**

596 Venous flow measured in aged mice

597 **Figure4\_Source Data1**

598 Capillary Po<sub>2</sub> measured in aged mice

599 **Figure4\_Source Data2**

600 Blood hematocrit level

601 **Figure4\_Source Data3**

602 Arterial (and venous) Po<sub>2</sub> measured in aged mice

603 **Figure5\_Source Data1**

604 Peak hemodynamic response amplitude measured in aged mice

605 **Figure6\_Source Data1**

606 Cortical capillary segment/length density measured in aged mice

607 **Figure7\_Source Data1**

608 Behavioral scores from NORT and Y-maze test

609

610

611

612 [Supplementary Figures]

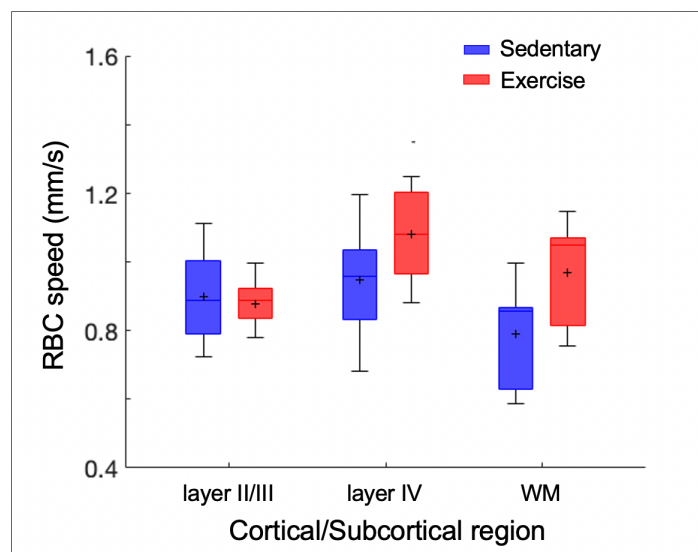

613

614 [Figure 3 – Figure supplement 1] Exercise induced alterations in capillary RBC speed. Capillary RBC speed across  
615 cortical layers II/III and IV, and subcortical white matter in aged sedentary and running mice, respectively. The  
616 analysis was made with 921, 486, and 112 capillaries across n=7 mice in the sedentary group and 1046, 465, and  
617 238 capillaries across n=8 mice in the exercise group in cortical layers, II/III, IV, and the white matter. Statistical  
618 comparisons were carried out using Two-way ANOVA with Tukey post hoc test.

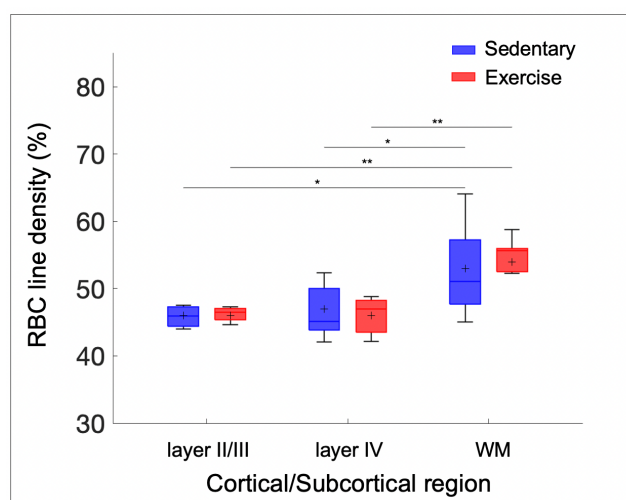

619

620 [Figure 3 – Figure supplement 2] Exercise induced alterations in capillary RBC line-density. Capillary RBC line-  
621 density across cortical layers II/III and IV, and subcortical white matter in aged sedentary and running mice. The  
622 analysis was made with 921, 486, and 112 capillaries across n=7 mice in sedentary group and 1046, 465, and 238  
623 capillaries across n=8 mice in the exercise group in cortical layers, II/III, IV, and the white matter. Statistical

624 comparisons were carried out using Two-way ANOVA with Tukey post hoc test. The single-asterisk symbol (\*)  
625 indicates  $p < 0.05$ ; the double-asterisk symbol (\*\*) indicates  $p < 0.01$ .

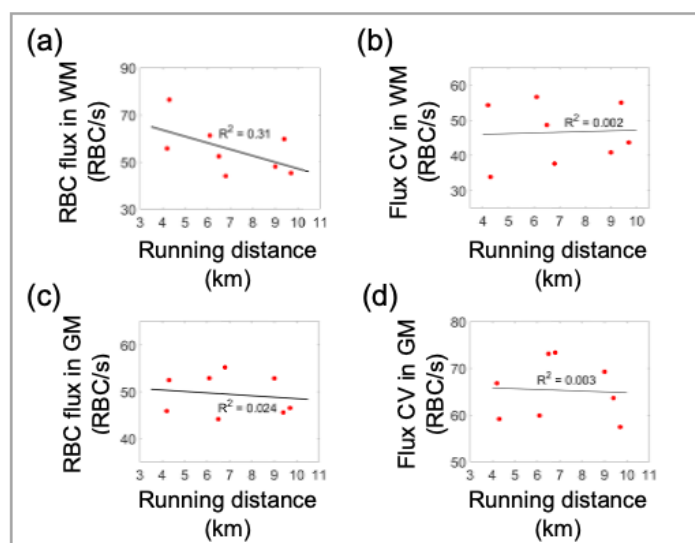

626  
627 [Figure 3 – Figure supplement 3] Correlations between the capillary RBC flux and CV, and the running activity.  
628 Each data point represents an individual animal. The black solid line is the best linear regression fit. (a) and (b)  
629 Correlations between the capillary RBC flux and CV in the white matter and the average daily running distance,  
630 respectively. (c) and (d) Correlations between the CV of capillary RBC flux and CV in the gray matter and the  
631 average daily running distance, respectively. For each animal, the gray matter capillary RBC flux was calculated  
632 by averaging the acquired flux values from cortical layers II/III and IV.

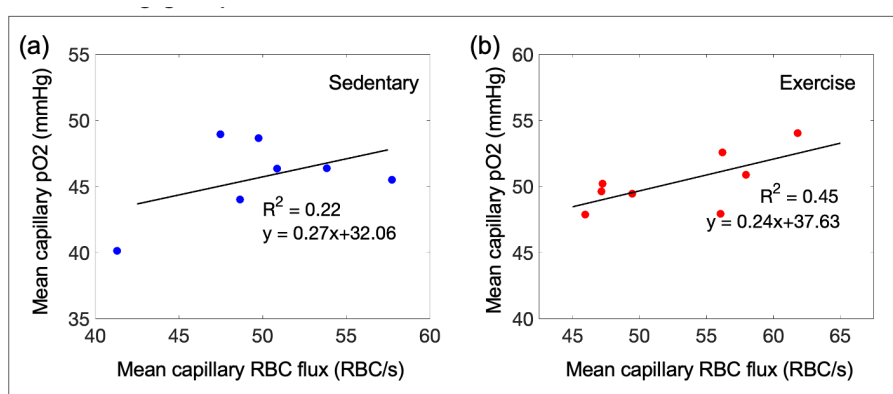

633  
634 [Figure 4 – Figure supplement 1] Capillary mean- $pO_2$  vs capillary RBC flux in the mouse cortex. (a) and (b)  
635 Correlations between the mean capillary  $pO_2$  and the mean capillary RBC flux in sedentary and running mice,  
636 respectively. The black solid line is the best fit result of each linear regression ( $R^2 = 0.22, y = 0.27x + 32.06$ ,  
637 for sedentary mice and  $R^2 = 0.45, y = 0.24x + 37.63$ , for running mice). Each data point represents an

638 individual animal. For each animal, the mean capillary RBC flux and the mean capillary  $pO_2$  were calculated by  
639 averaging the acquired RBC flux and  $pO_2$  values from cortical layers II/III and IV, and cortical layers I, II/III, and  
640 IV, respectively. The correlation coefficient (the R value) for each group was converted to Fisher z value to  
641 compare difference between correlation coefficients of sedentary and running mice, and no significant difference  
642 was found (the observed z value = 0.44).

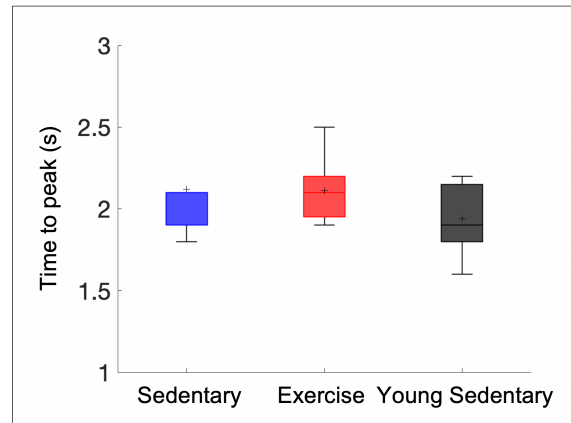

643

644 [Figure 5 – Figure supplement 1 Differences in the latency (time to peak) of stimulus-induced hemodynamic  
645 response between sedentary, running, and younger mice. Statistical comparisons were carried out using One-way  
646 ANOVA with Tukey post hoc test.

647

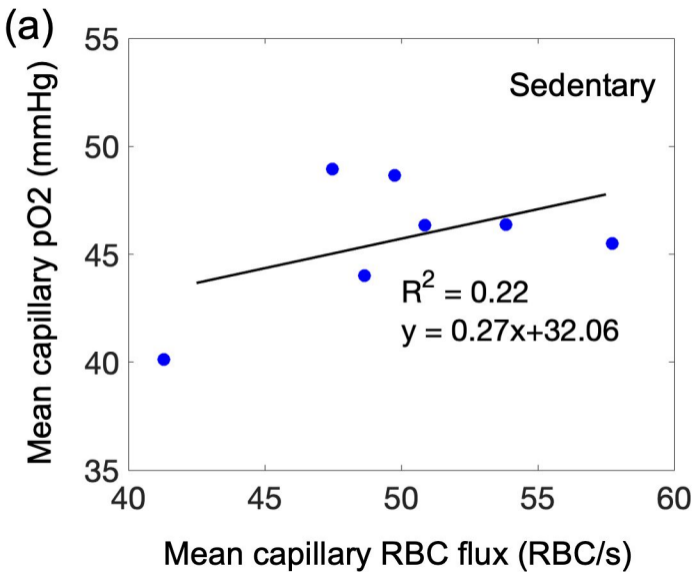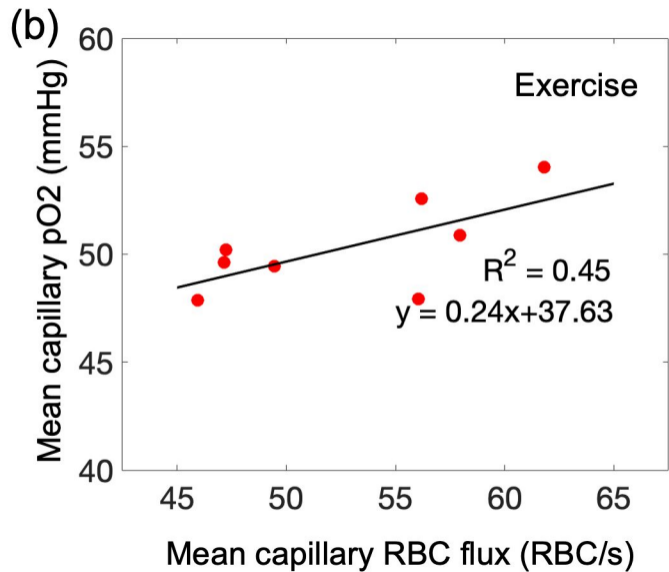

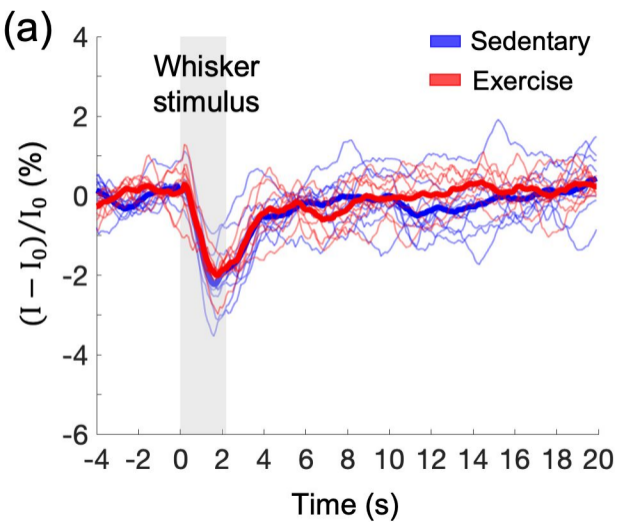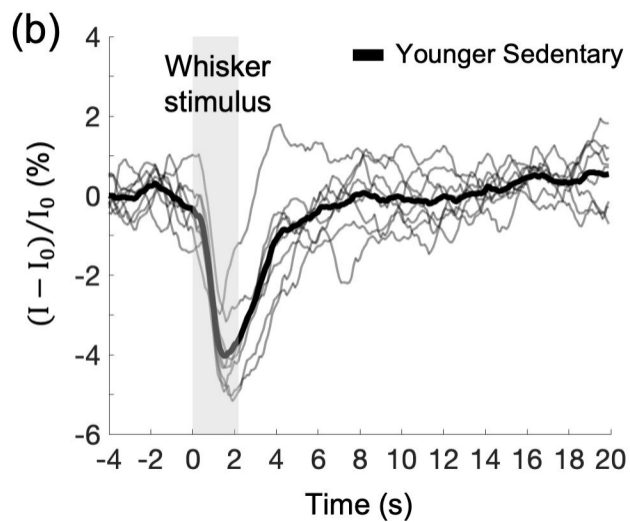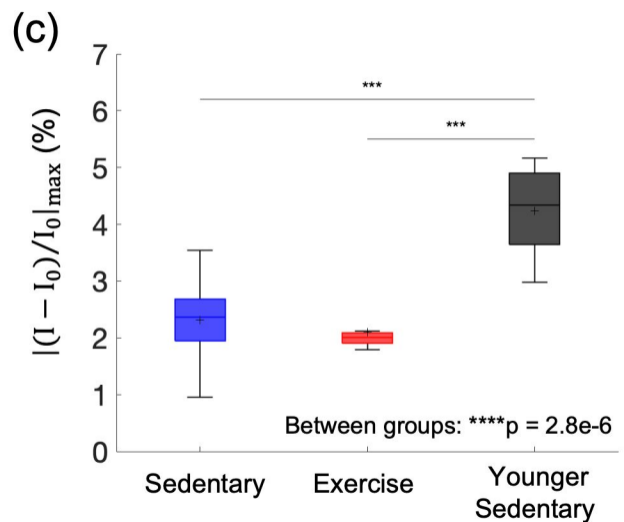

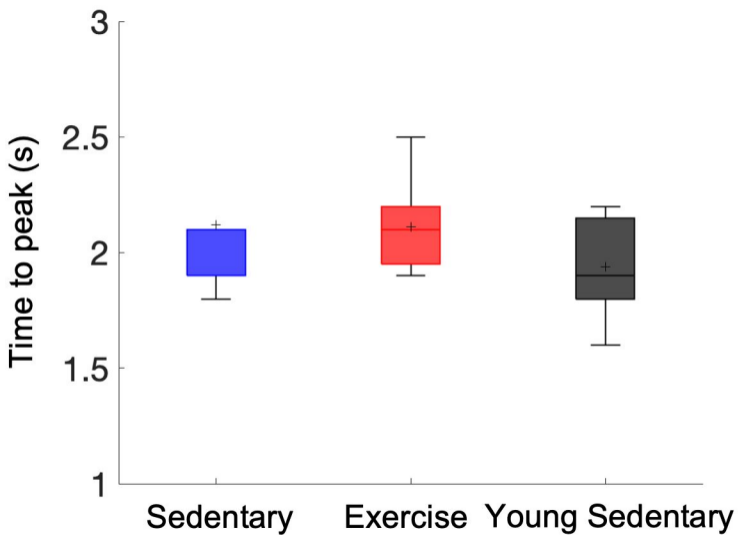

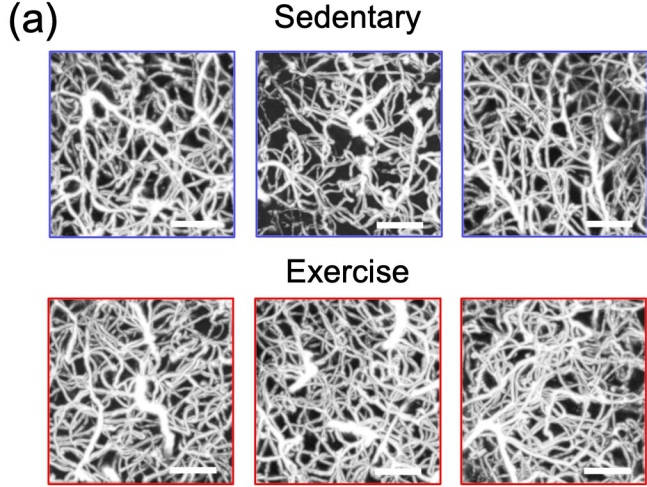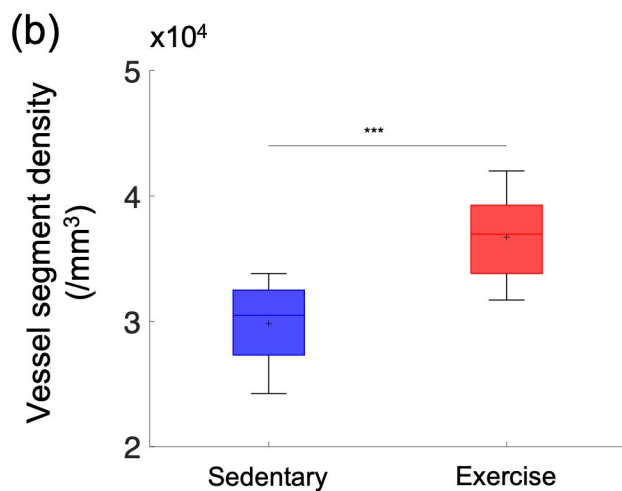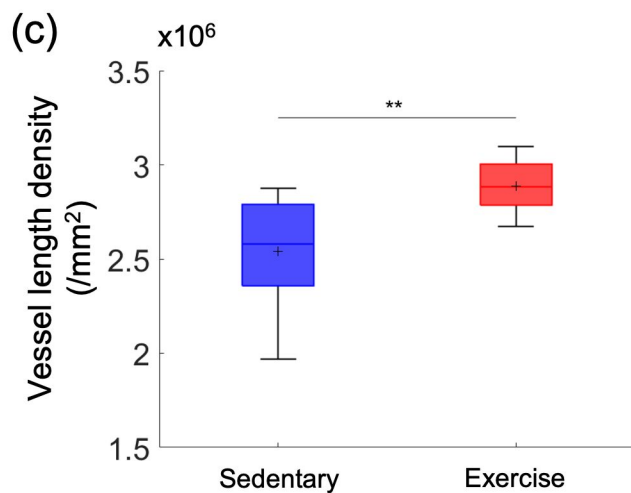



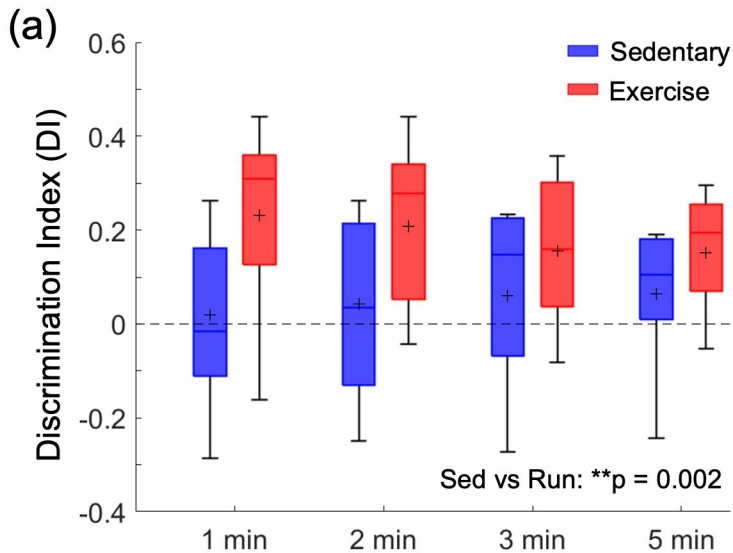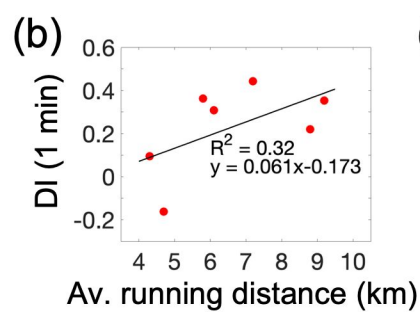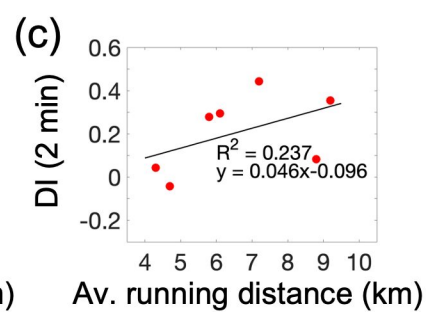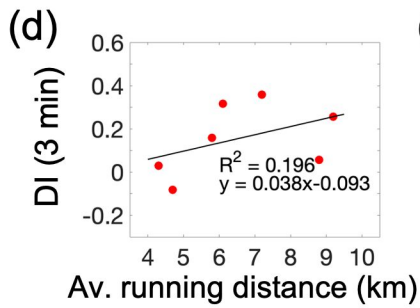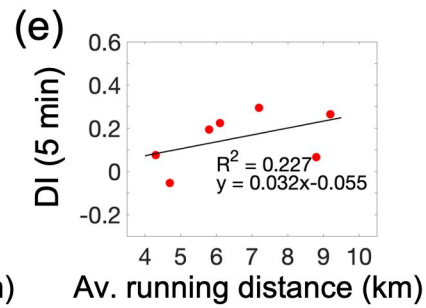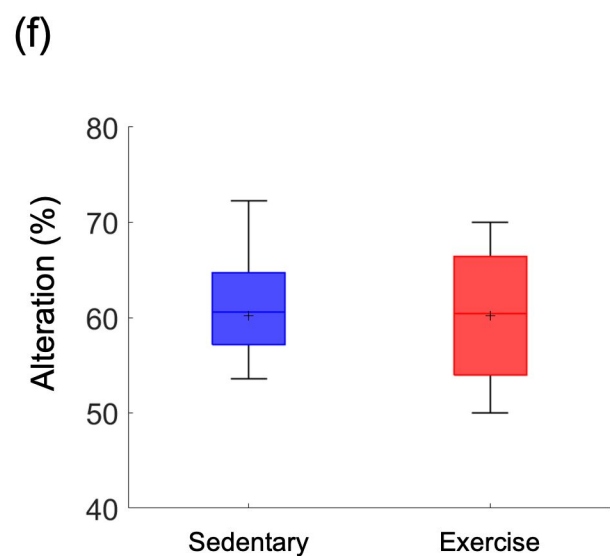

Supplement: NIHPP2023.02.12.528244v1-supplement-1.pdf [file NIHPP2023.02.12.528244v1-supplement-1.pdf]
